# Supplementary material for: Metallo-supramolecular polymers derived from benzothiadiazole-based platinum acetylide complexes for fluorescent security application
Source: Royal Society of Chemistry journal article supplement (doi:10.1039/c8ra08615j), 2018-01-01
Supplement: c8ra08615j1.pdf [file c8ra08615j1.pdf]

## Supporting Information

|                                                                                                                      |     |
|----------------------------------------------------------------------------------------------------------------------|-----|
| 1. <i>Materials and Methods</i>                                                                                      | S2  |
| 2. <i>Synthetic routes to the targeted monomer</i>                                                                   | S3  |
| 2.2 <i>Synthesis of compound 5</i>                                                                                   | S4  |
| 2.3 <i>Synthesis of monomer</i>                                                                                      | S5  |
| 3. <i>ITC data for the consecutive injecting of Zn(OTf)<sub>2</sub> into the monomer</i>                             | S7  |
| 4. <i>Emission lifetime of the monomer</i>                                                                           | S8  |
| 5. <i>Concentration-dependent <sup>1</sup>H NMR spectra of supramolecular polymer 1</i>                              | S8  |
| 6. <i>DOSY spectra of supramolecular polymer 1</i>                                                                   | S9  |
| 7. <i>Responsiveness of supramolecular polymer 1 upon addition of cyclen, then Zn<sup>2+</sup>.</i>                  | S9  |
| 8. <i><sup>1</sup>H-NMR responsiveness of supramolecular polymer 1 upon addition of cyclen, then Zn<sup>2+</sup></i> | S10 |

## 1. Materials and Methods

4-Bromobenzaldehyde, 2-Acetylpyridine, Triethylphosphine, copper(I) iodide, *Trans*-dichloro bis(triphenyl-phosphine)palladium(II) were reagent grade and used as received. *Trans*-[Pt(PEt<sub>3</sub>)<sub>2</sub>I<sub>2</sub>], compound **3** and compound **4** were synthesized according to the previously reported method<sup>[S1-S3]</sup>. Other reagents and solvents were employed as purchased. <sup>1</sup>H NMR spectra were collected on a Varian Unity INOVA-300 or INOVA-400 spectrometer with TMS as the internal standard. <sup>13</sup>C NMR spectra were recorded on a Varian Unity INOVA-300 spectrometer at 100 MHz. The two-dimensional DOSY experiment was performed on a Varian Unity INOVA-400 MHz spectrometer. Electrospray ionization mass spectra (ESI-MS) were obtained on a Bruker Esquire 3000 plus mass spectrometer (Bruker-Franzen Analytik GmbH Bremen, Germany) equipped with an ESI interface and ion trap analyzer. The UV/Vis spectra were recorded on a Beijing Persee TU-1901 UV-Vis spectrometer. Viscosity measurements were carried out with a Ubbelohde semi-micro dilution viscometer (Shanghai Liangjing Glass Instrument Factory, 0.36 mm inner diameter) at 25 °C in CHCl<sub>3</sub>/CH<sub>3</sub>OH (2:1, v:v). ITC experiments were carried out using a Microcal VP-ITC apparatus.

## 2. Synthetic routes to the targeted monomer 1

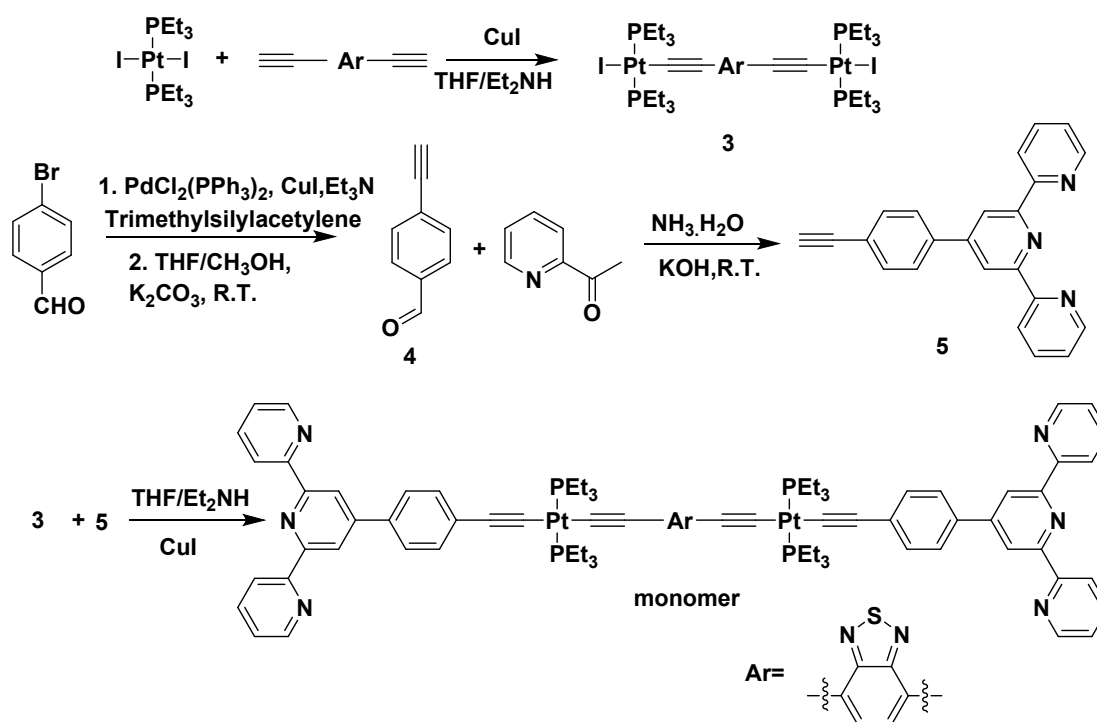

**Scheme S1.** Synthetic route to the monomer.

### 2.1 Synthesis of compound 5

Compound **4** (0.56 g, 4.3 mmol), 2-Acetylpyridine (1.04 g, 8.6 mmol), KOH (0.5 g, 8.9 mmol) were dissolved in 20 mL  $\text{NH}_3\cdot\text{H}_2\text{O}$  for 15 h at room temperature. The reaction mixture was filtrated and the solid was recrystallized by employing  $\text{C}_2\text{H}_5\text{OH}$  to provide compound **5** a grayish yellow solid (430 mg, 30%).  $^1\text{H}$  NMR spectrum of compound **5** is shown in Figure S1,  $^1\text{H}$  NMR (300 MHz,  $\text{CDCl}_3$ , room temperature)  $\delta(\text{ppm})$ :  $\delta$  8.73 (s, 4H), 8.68 (d,  $J = 6$  Hz, 2H), 7.85-7.91 (m, 4H), 7.65 (d,  $J = 9$  Hz, 2H), 7.34-7.38 (m, 2H), 3.19 (s, 1H).<sup>[S4]</sup>

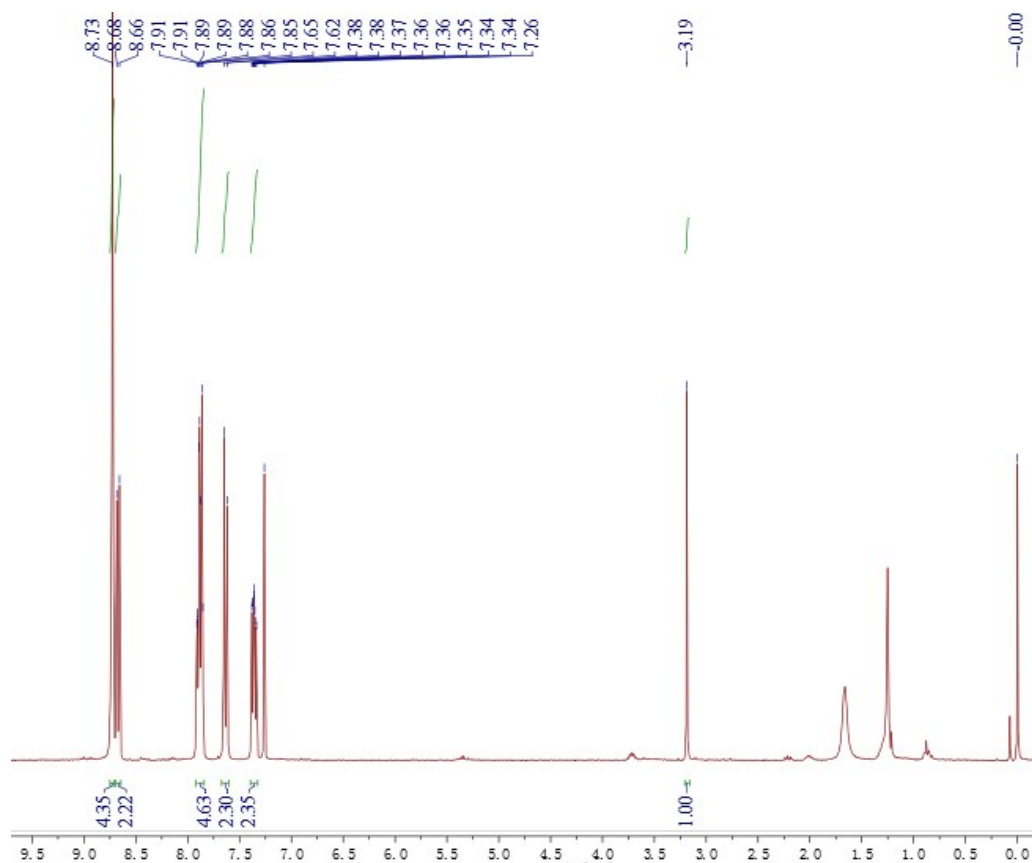

**Figure S1.**  $^1\text{H}$  NMR spectrum (300 MHz,  $\text{CDCl}_3$ , room temperature) of compound **5**

## 2.2 Synthesis of monomer

Compound **5** (186 mg, 0.56 mmol), CuI (15 mg, 0.08 mmol) were stirred in THF/ $\text{Et}_2\text{NH}$  (30 mL, 1:1, v/v) at room temperature under  $\text{N}_2$  atmosphere. Then compound **3** was added slowly to the reaction and continue stirred for 24 h. The reaction mixture was concentrated and the residue was extracted with  $\text{H}_2\text{O}/\text{CH}_2\text{Cl}_2$ . The organic extracts were combined and concentrated, which was further purified by flash column chromatography ( $\text{CH}_2\text{Cl}_2/\text{CH}_3\text{OH}=60:1$ , v/v as the eluent) to provide monomer as a orange solid (187 mg, 49.1%).  $^1\text{H}$  NMR spectrum of monomer is shown in Figure S2,  $^1\text{H}$  NMR (300 MHz,  $\text{CDCl}_3$ , room temperature)  $\delta(\text{ppm})$ : 8.73-8.74 (m, 8H), 8.68 (d,  $J = 9.0$  Hz, 4H), 7.85-7.91 (m, 4H), 7.82 (d,  $J = 6.0$  Hz, 4H), 7.43(d,  $J = 9$  Hz, 4H), 7.34-7.37 (m, 6H), 2.26-2.34 (m, 24H), 1.25-1.32 (m, 36H).

The  $^{13}\text{C}$  NMR spectrum of monomer is shown in Figure S3.  $^{13}\text{C}$  NMR (100 MHz,  $\text{CDCl}_3$ , room temperature)  $\delta$  (ppm): 155.35, 155.24, 154.80, 148.98, 148.08, 135.81, 133.65, 130.36, 129.53, 128.82, 125.85, 122.73, 120.32, 118.03, 117.37, 116.62, 109.83, 108.97, 105.78, 15.38, 7.43. ESI-MS  $m/z$ :  $[\text{M} + \text{H}]^+$ , calculated 1709.78; found 1710.44.  $^{31}\text{P}$  NMR (162 MHz,  $\text{CDCl}_3$ , room temperature)  $\delta$  (ppm): 11.35.

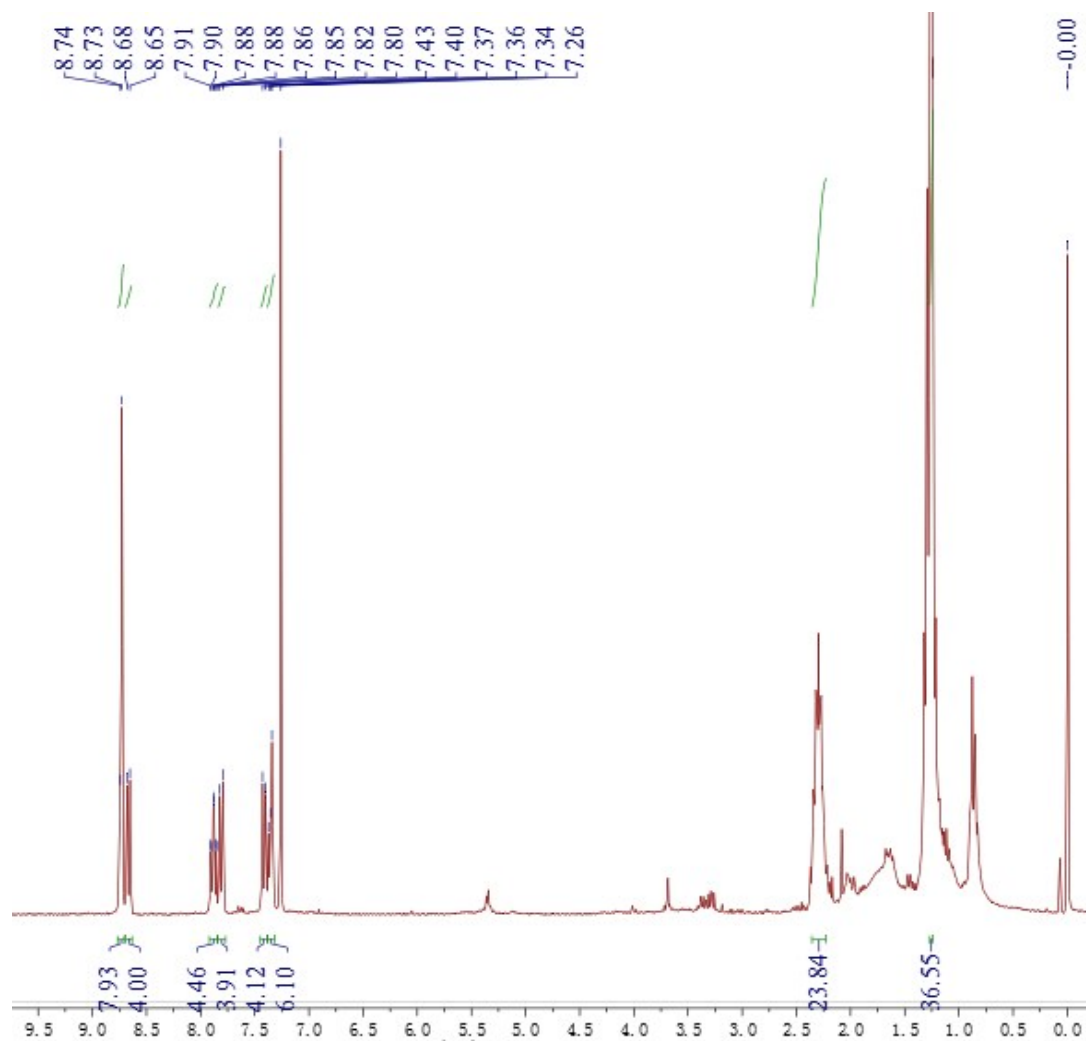

**Figure S2.**  $^1\text{H}$  NMR spectrum (300 MHz,  $\text{CDCl}_3$ , room temperature) of monomer

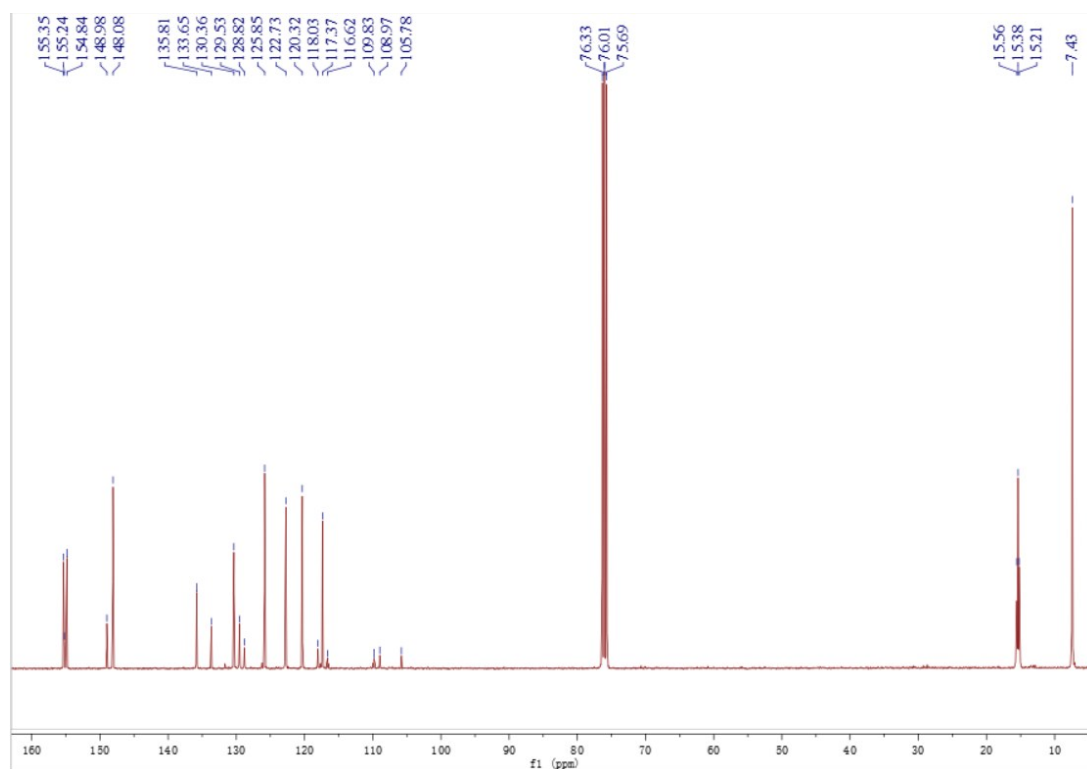

**Figure S3.**  $^{13}\text{C}$  NMR spectrum (100 MHz,  $\text{CDCl}_3$ , room temperature) of monomer

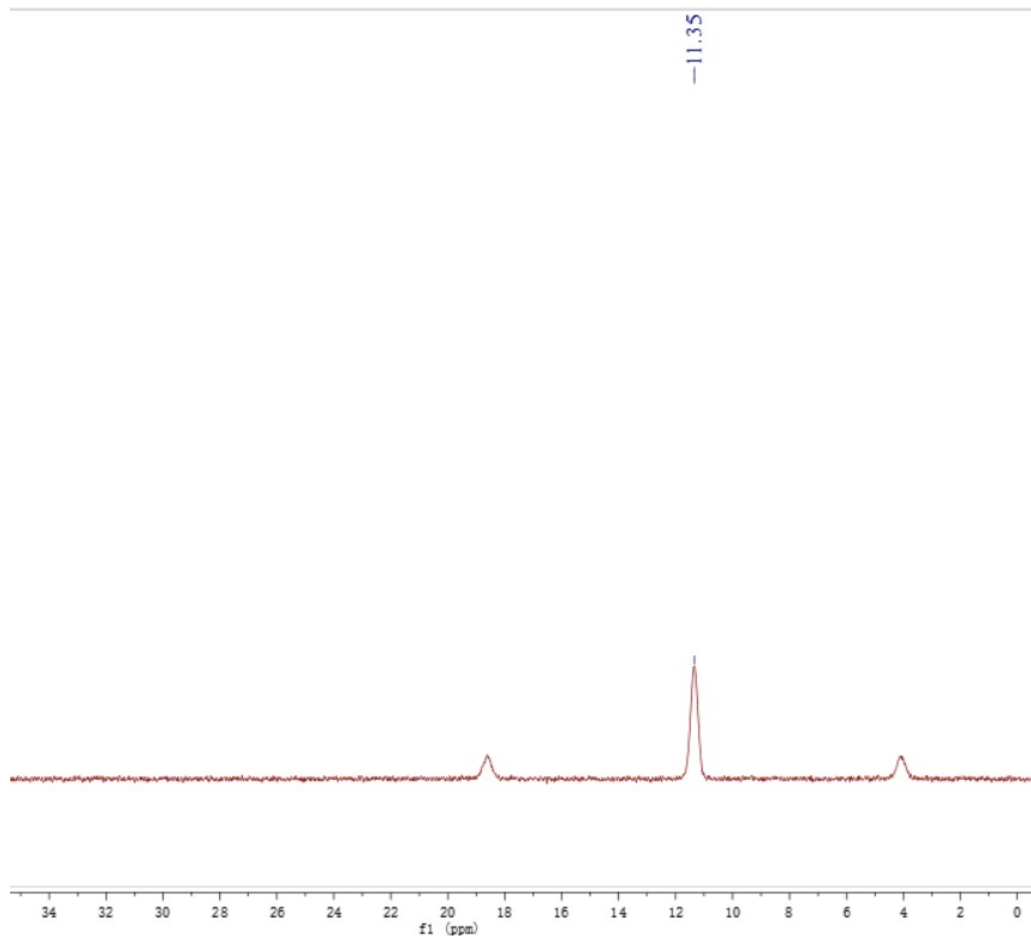

**Figure S4.**  $^{31}\text{P}$  NMR spectrum (162 MHz,  $\text{CDCl}_3$ , room temperature) of monomer

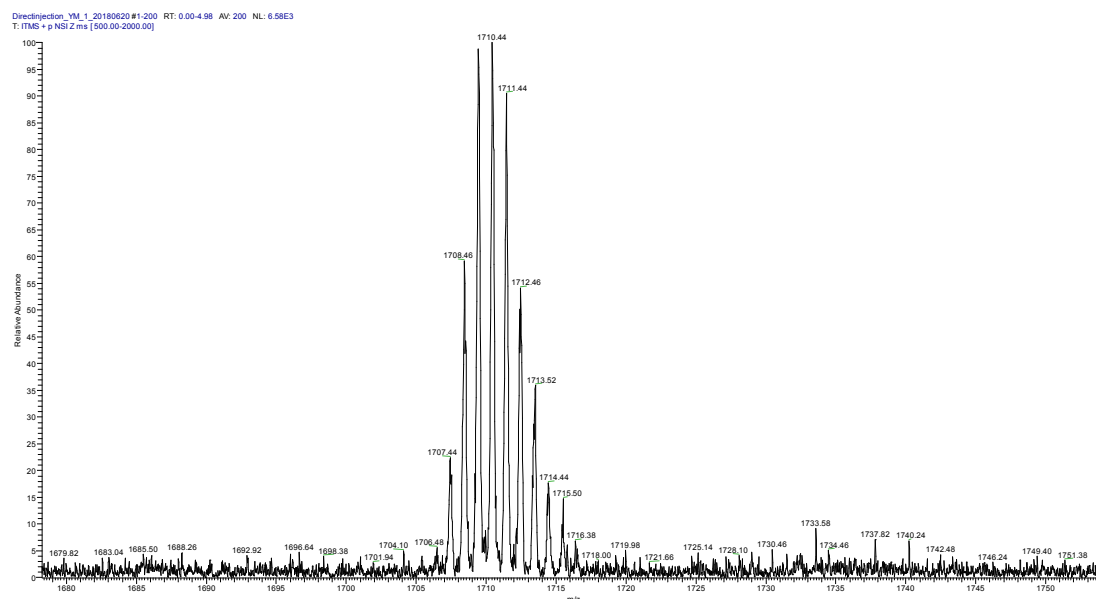

**Figure S5.** Electrospray ionization spectrum of monomer

### 3. ITC data for the consecutive injecting of $\text{Zn}(\text{OTf})_2$ into the monomer

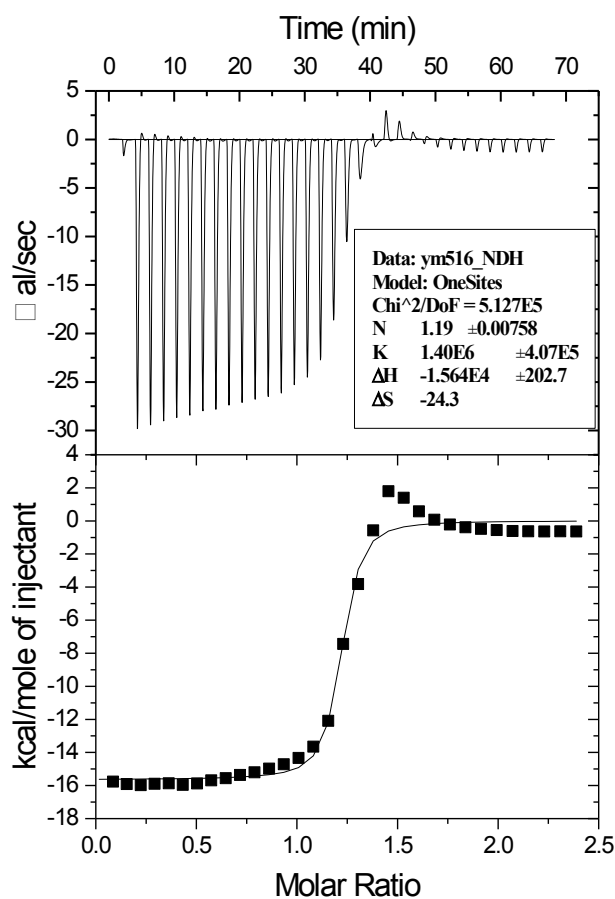

**Figure S6.** ITC data for the consecutive injecting of  $\text{Zn}(\text{OTf})_2$  (5 mmol/L) into the  $\text{CHCl}_3:\text{CH}_3\text{OH}=2:1$  solution of monomer (0.4 mmol/L)

4. The emission lifetime of monomer

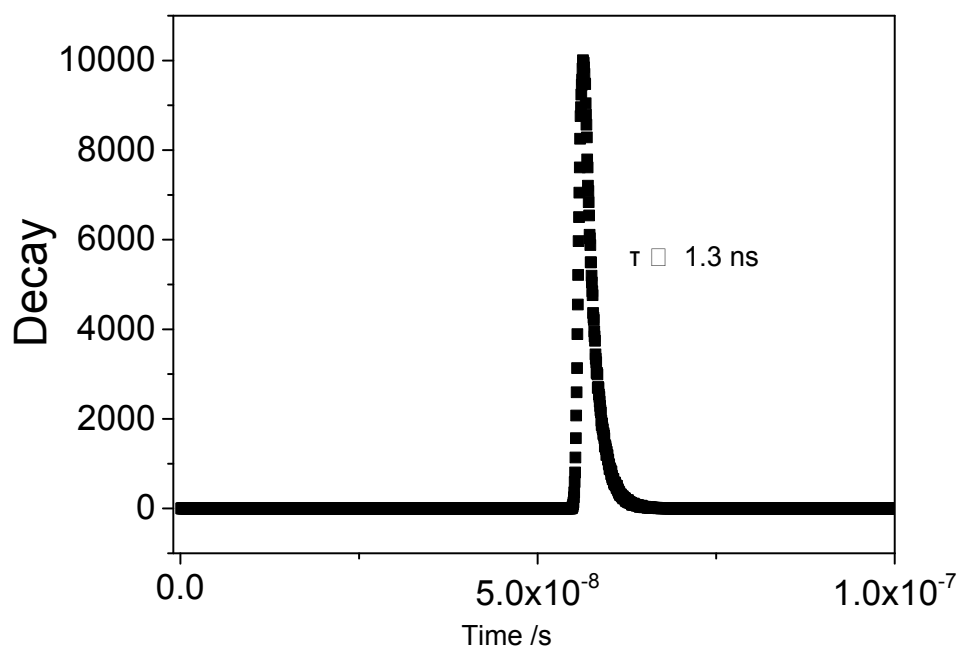

**Figure S7.** The emission lifetime of monomer

5. Concentration-dependent  $^1\text{H}$  NMR spectra of supramolecular polymer **1**

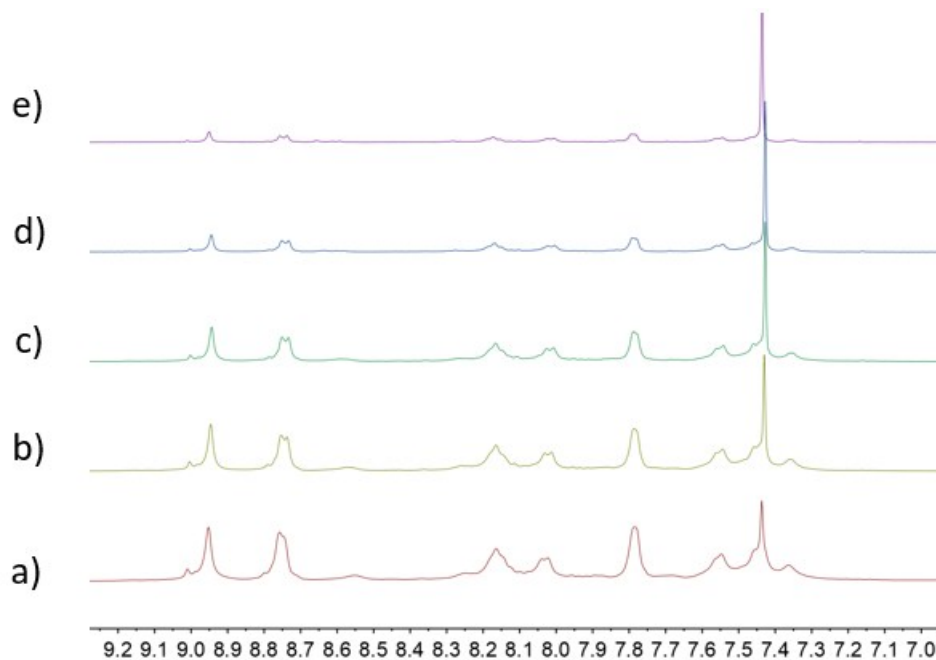

**Figure S8.** Concentration-dependent  $^1\text{H}$  NMR (300 MHz,  $\text{CDCl}_3/\text{CD}_3\text{OH}$  (2/1, v/v), 25  $^\circ\text{C}$ ) spectra of supramolecular polymer **1**



## 6. DOSY spectra of supramolecular polymer **1**

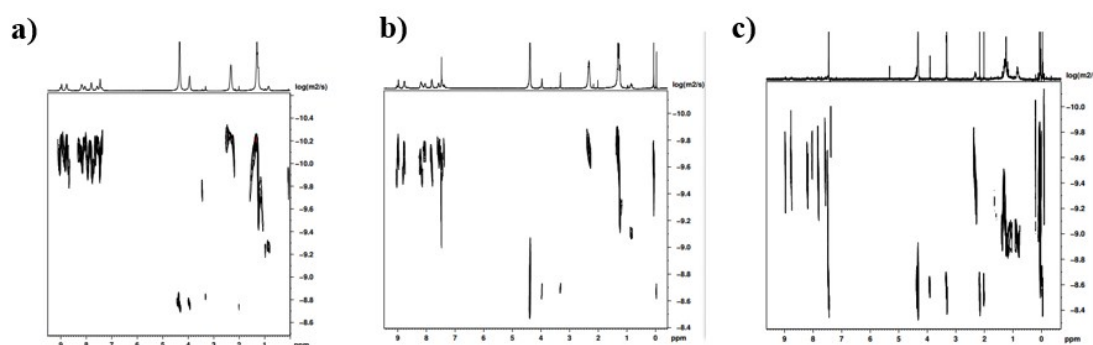

**Figure S9.** Two-dimensional diffusion-ordered NMR (DOSY) spectra of supramolecular polymer **1** in  $\text{CDCl}_3/\text{CD}_3\text{OD}$  (2/1, v/v) at different concentrations: (a) 35.0 mM; (b) 11.7 mM; (c) 0.5 mM.

## 7. Responsiveness of supramolecular polymer **1** upon addition of cyclen, then $\text{Zn}^{2+}$ .

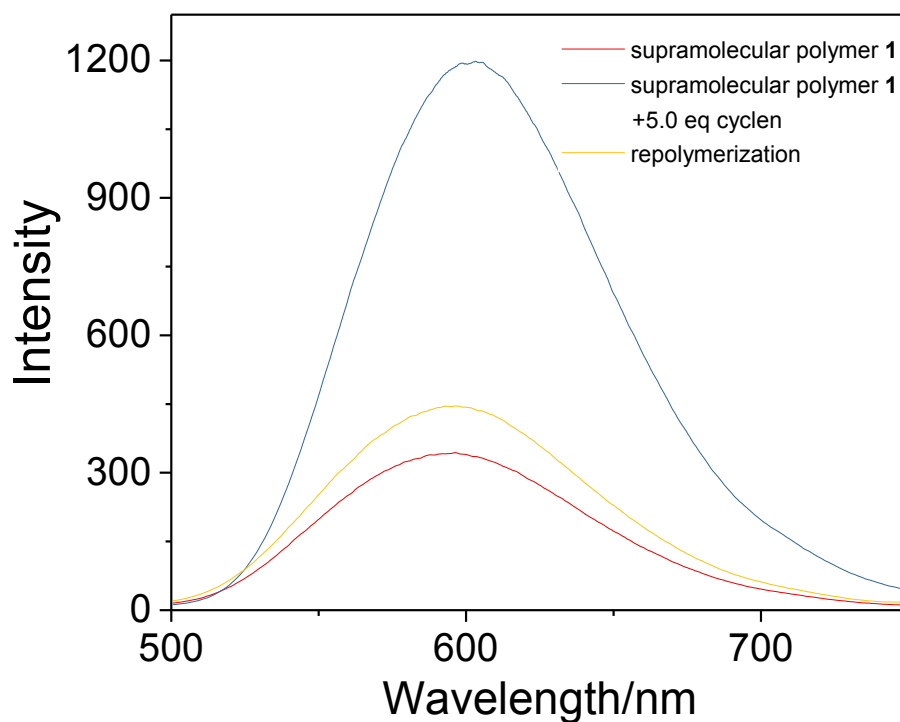

**Fig S10** Fluorescence spectral changes of supramolecular polymer **1** upon addition of cyclen and then  $\text{Zn}(\text{OTf})_2$ .

8.  $^1\text{H}$ -NMR responsiveness of supramolecular polymer **1** upon addition of cyclen,  $\text{Zn}^{2+}$

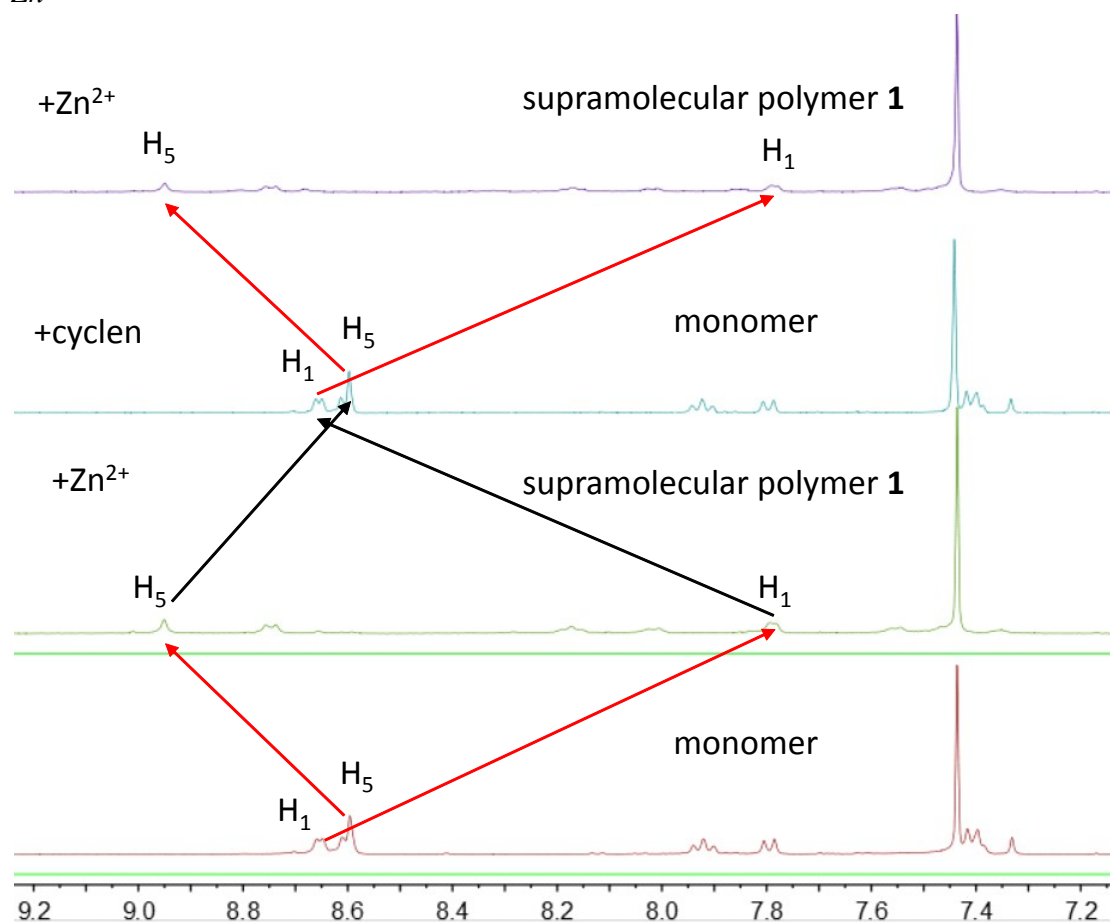

**Fig S11.**  $^1\text{H}$  NMR of monomer, supramolecular polymer **1**, monomer, supramolecular polymer **1** (from bottom to top is monomer, supramolecular polymer **1**, monomer, supramolecular polymer **1**)

References:

- S1 E-T. Shi, Z. Gao, M. Yuan, X-Y. Wang, F. Wang. *Polym. Chem.*, **2015**, 6, 5575–5579.
- S2 R. Y Huang, Y. H. Chiu, Y. H. Chang, K. Y. Chen, P. T. Huang, T. H. Chiang, Y. J. Chang. *New J. Chem.* **2017**, 41, 8016.
- S3 V. Grosshenny, F. M. Romero, R. Ziessel. *J. Org. Chem.* **1997**, 62, 1491.
- S4 K. Ackermann, A. Giannoulis, D. B. Cordes, A. M. Z. Slawin, B. E. Bode. *Chem. Commun.* **2015**, 51, 5257.
